# Supplementary material
Source: PubMed Central journal article supplement (PMC10405294)
Supplement: NIHMS1921611-supplement-supplementary.pdf [file NIHMS1921611-supplement-supplementary.pdf]

# Nanoscale Characterization of Parallel and Anti-parallel $\beta$ -Sheet Amyloid Beta 1-42 Aggregates

Kiryl Zhaliaska<sup>1</sup> and Dmitry Kurouski<sup>1,2\*</sup>

1. Department of Biochemistry and Biophysics, Texas A&M University, College Station, Texas 77843, United States
2. Department of Biomedical Engineering, Texas A&M University, College Station, Texas, 77843, United States

Corresponding author: dkurouski@tamu.edu

## Supporting Information

**Table S1.** Content table of conformations in percentage of Amide I area in selected by PCA groups of Ab<sub>1-42</sub> aggregates in each time points.

| Structure         | Wavenumber                          | Time of incubation  |           |     |    |           |      |              |    |           |      |    |              |    |    |         |       |           |    |              |    |         |    |    |
|-------------------|-------------------------------------|---------------------|-----------|-----|----|-----------|------|--------------|----|-----------|------|----|--------------|----|----|---------|-------|-----------|----|--------------|----|---------|----|----|
|                   |                                     | oh                  |           | 4 h |    |           | 24 h |              |    |           | 72 h |    |              |    |    |         | 168 h |           |    |              |    |         |    |    |
|                   |                                     | monomer             | oligomers |     |    | oligomers |      | protofibrils |    | oligomers |      |    | protofibrils |    |    | fibrils |       | oligomers |    | protofibrils |    | fibrils |    |    |
|                   |                                     | groups              |           |     |    |           |      |              |    |           |      |    |              |    |    |         |       |           |    |              |    |         |    |    |
|                   |                                     | —                   | 1         | 2   | 3  | 1         | 2    | 3            | 1  | 2         | 1    | 2  | 3            | 1  | 2  | 3       | 1     | 2         | 1  | 2            | 1  | 2       |    |    |
|                   |                                     | % in Amide I region |           |     |    |           |      |              |    |           |      |    |              |    |    |         |       |           |    |              |    |         |    |    |
| ↑↑ $\beta$ -sheet | $\approx 1625-1636 \text{ cm}^{-1}$ | 16                  | 81        | 76  | 85 | 63        | 79   | 44           | 83 | 47        | 45   | 38 | 34           | 45 | 39 | 37      | 45    | 32        | 74 | 78           | 54 | 70      | 69 | 77 |
| $\beta$ -turn     | $\approx 1667 \text{ cm}^{-1}$      | 84                  | 14        | 15  | 12 | 15        | 14   | 24           | 9  | 32        | 25   | 23 | 26           | 28 | 30 | 30      | 24    | 30        | 14 | 13           | 23 | 18      | 7  | 13 |
| ↑↓ $\beta$ -sheet | $\approx 1694 \text{ cm}^{-1}$      | —                   | 5         | 9   | 3  | 22        | 8    | 32           | 8  | 20        | 30   | 39 | 40           | 27 | 31 | 33      | 31    | 38        | 12 | 9            | 23 | 11      | 24 | 10 |

**Table S2.** Bonferroni corrected Post Hoc T-test and ANOVA results of variance in toxicity exerted by Ab<sub>1-42</sub> aggregates formed at different time periods of protein aggregation according to the LDH assay.

Asterisk (\*) show 95% confidence interval for the true value of median for each compared group of spectra; NS is non-significant difference.

|                | P-value   |    |
|----------------|-----------|----|
| 0h to 4h       | 0.01      | NS |
| 0h to 24h      | 0.0001    | *  |
| 0h to 72h      | 0.000001  | *  |
| 0h to 168h     | 0.00019   | *  |
| 4h to 24h      | 0.00036   | *  |
| 4h to 72h      | 0.000003  | *  |
| 4h to 168h     | 0.0002    | *  |
| 24h to 72h     | 0.0005    | *  |
| 24h to 168h    | 0.0007    | *  |
| 72h to 168h    | 0.0018    | *  |
| Contr. to 0h   | 0.02      | NS |
| Contr. to 4h   | 0.04      | NS |
| Contr. to 24h  | 0.0012    | *  |
| Contr. to 72h  | 0.0000023 | *  |
| Contr. to 168h | 0.000056  | *  |

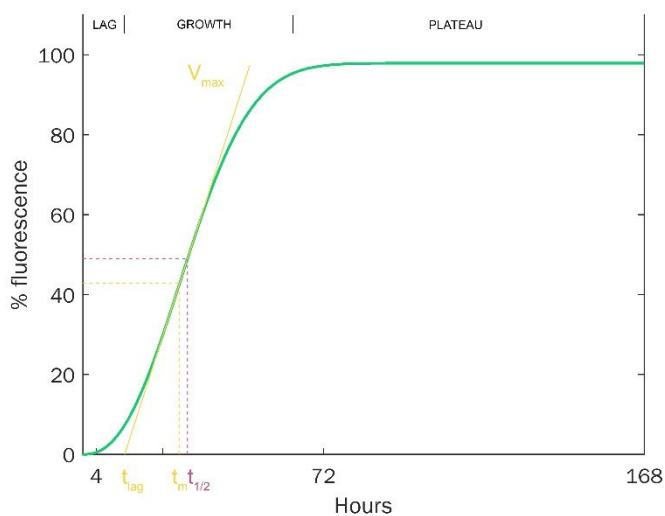

**Figure S1.** Fitted kinetic curve of thioflavin T fluorescence using modified version of the Avrami equation. The aggregation kinetics observed in ThT analysis has a typical sigmoid trend of the thioflavin T fluorescence signal.

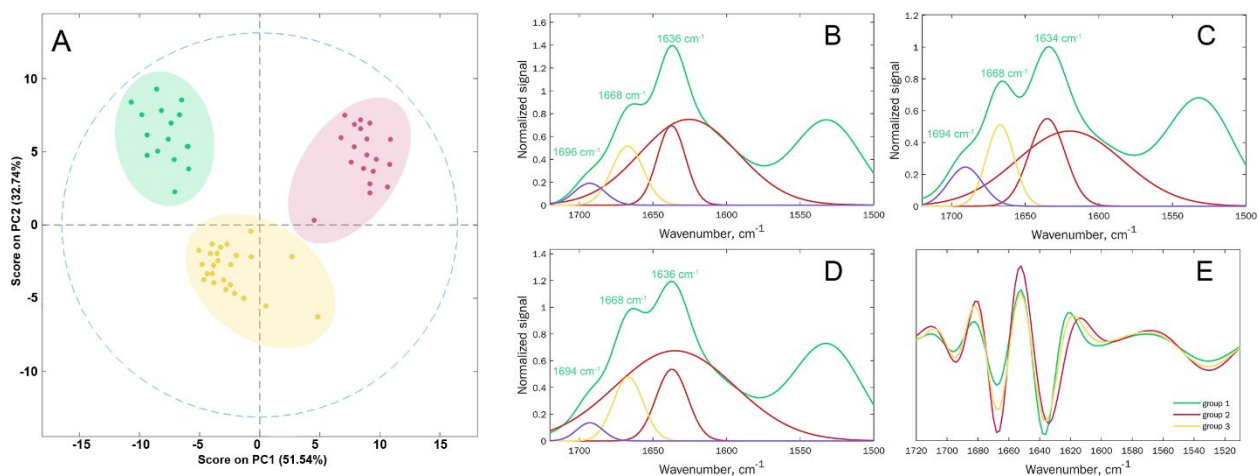

**Figure S2.** (A) PCA of spectra of  $A\beta_{1-42}$  oligomers at 4-hour incubation time point, group 1 (green), group 2 (red), group 3 (yellow). Fitted average IR-spectrum from group 1(B), group 2(C), group 3(D) of  $A\beta_{1-42}$  oligomers at 4-hour incubation time point and corresponded structures: green line – fitted spectrum, red line – parallel beta-sheet, yellow line – unordered, violet line – anti-parallel beta-sheet. (E) Second derivative spectra of Amide I and Amide II region of 3 groups of aggregates.

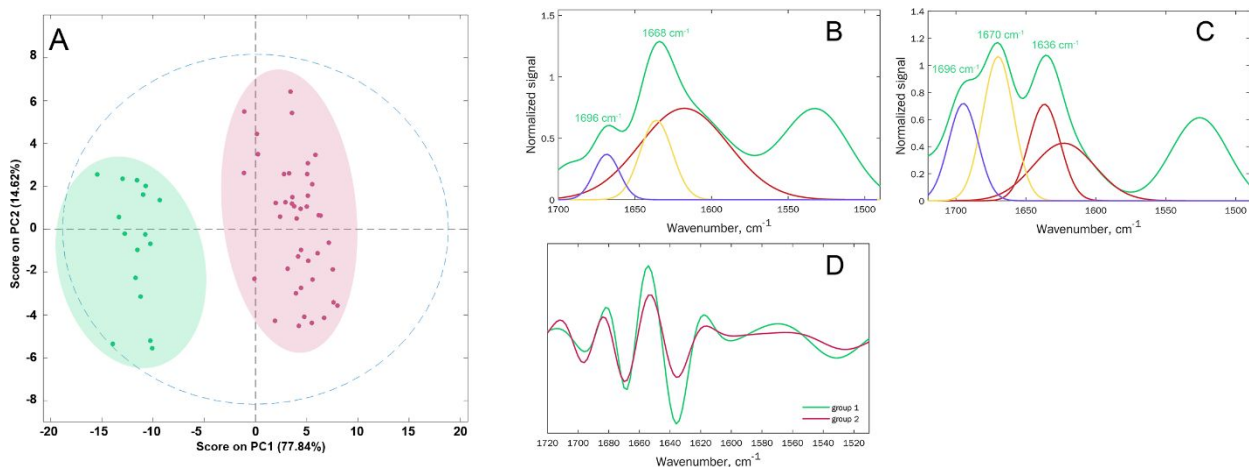

**Figure S3.** (A) PCA of spectra of  $A\beta_{1-42}$  protofibrils at 24-hour incubation time point, group 1 (green), group 2 (red). Fitted average IR-spectrum from group 1(B), group 2(C) of  $A\beta_{1-42}$  protofibrils at 24-hour incubation time point and corresponded structures: green line – fitted spectrum, red line – parallel beta-sheet, yellow line – unordered, violet line – anti-parallel beta-sheet. (D) Second derivative spectra of Amide I and Amide II region of 2 groups of aggregates.

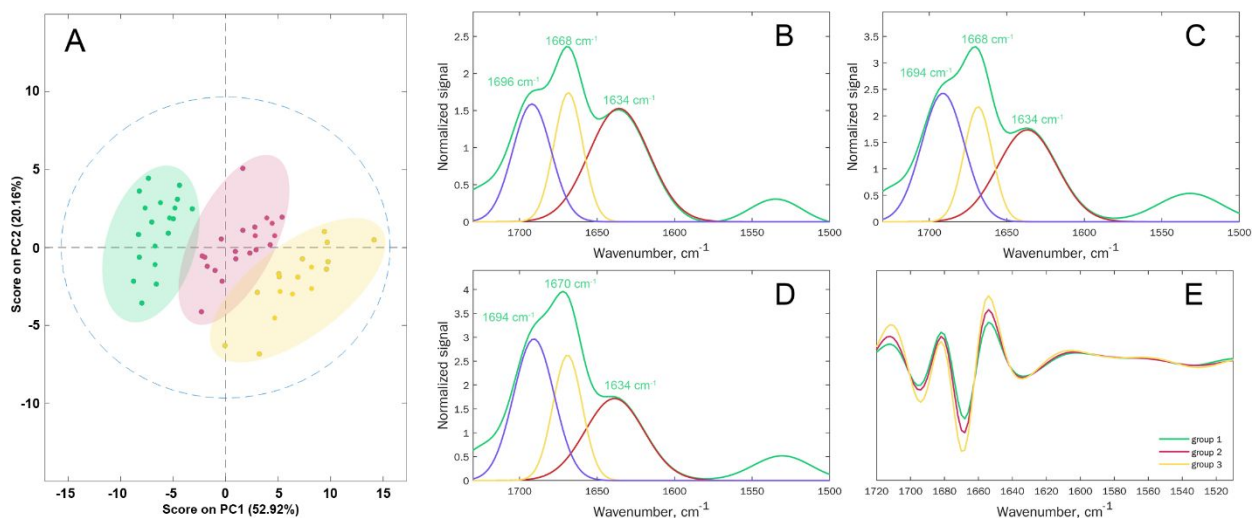

**Figure S4.** (A) PCA of spectra of A $\beta_{1-42}$  oligomers at 72-hour incubation time point, group 1 (green), group 2 (red), group 3 (yellow). Fitted average IR-spectrum from group 1(B), group 2(C), group 3(D) of A $\beta_{1-42}$  oligomers at 72-hour incubation time point and corresponded structures: green line – fitted spectrum, red line – parallel beta-sheet, yellow line – unordered, violet line – anti-parallel beta-sheet. (E) Second derivative spectra of Amide I and Amide II region of 3 groups of aggregates.

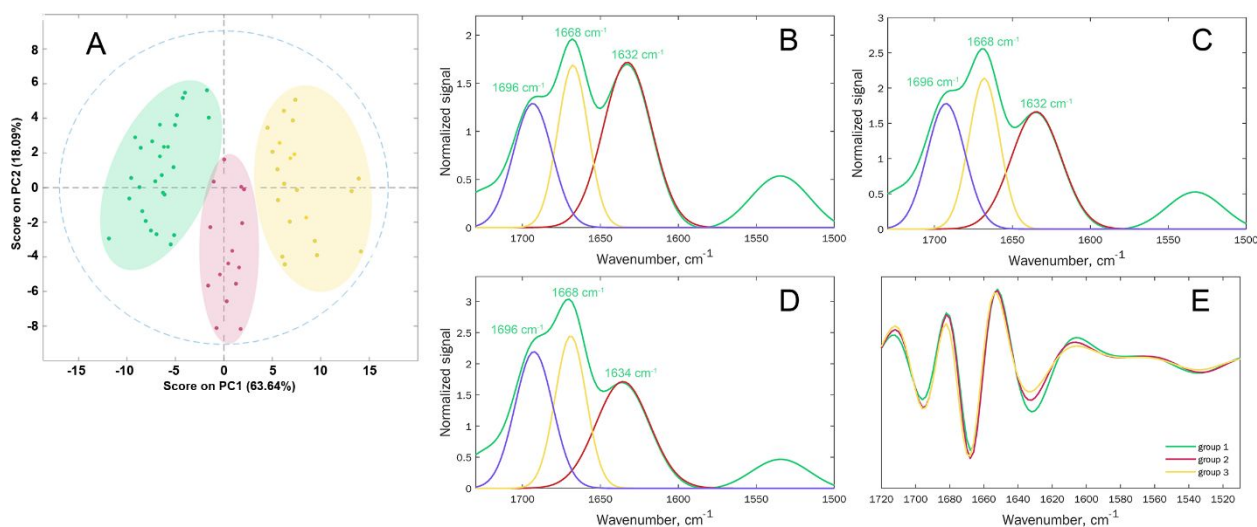

**Figure S5.** (A) PCA of spectra of A $\beta_{1-42}$  protofibrils at 72-hour incubation time point, group 1 (green), group 2 (red), group 3 (yellow). Fitted average IR-spectrum from group 1(B), group 2(C), group 3(D) of A $\beta_{1-42}$  protofibrils at 72-hour incubation time point and corresponded structures: green line – fitted spectrum, red line – parallel beta-sheet, yellow line – unordered, violet line – anti-parallel beta-sheet. (E) Second derivative spectra of Amide I and Amide II region of 3 groups of aggregates.

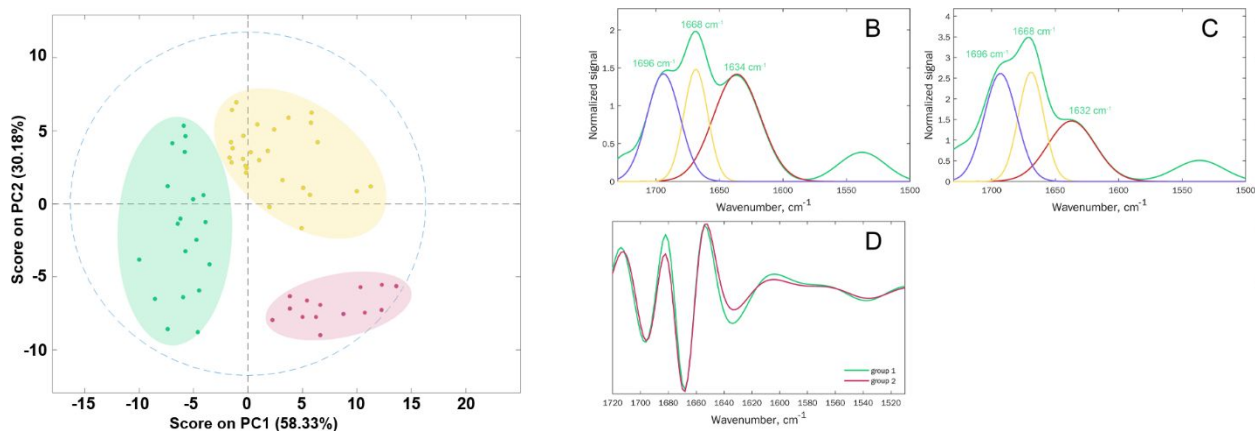

**Figure S6.** (A) PCA of spectra of  $A\beta_{1-42}$  fibrils at 72-hour incubation time point, group 1 (green), group 2 (red). Fitted average IR-spectrum from group 1(B), group 2(C) of  $A\beta_{1-42}$  protofibrils at 72-hour incubation time point and corresponded structures: green line – fitted spectrum, red line – parallel beta-sheet, yellow line – unordered, violet line – anti-parallel beta-sheet. (D) Second derivative spectra of Amide I and Amide II region of 2 groups of aggregates.

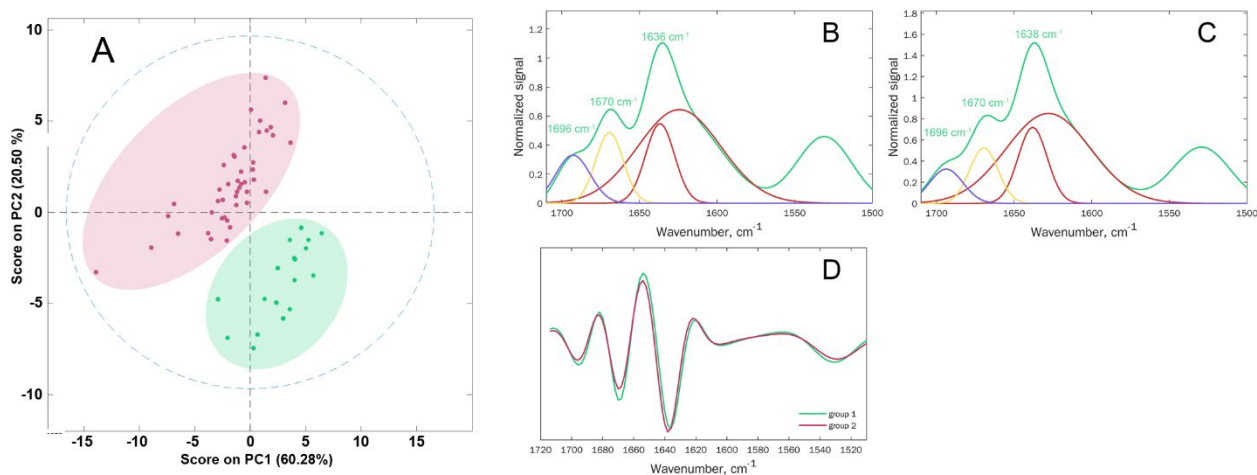

**Figure S7.** (A) PCA of spectra of  $A\beta_{1-42}$  oligomers at 168-hour incubation time point, group 1 (green), group 2 (red). Fitted average IR-spectrum from group 1(B), group 2(C) of  $A\beta_{1-42}$  oligomers at 168-hour incubation time point and corresponded structures: green line – fitted spectrum, red line – parallel beta-sheet, yellow line – unordered, violet line – anti-parallel beta-sheet. (D) Second derivative spectra of Amide I and Amide II region of 2 groups of aggregates.

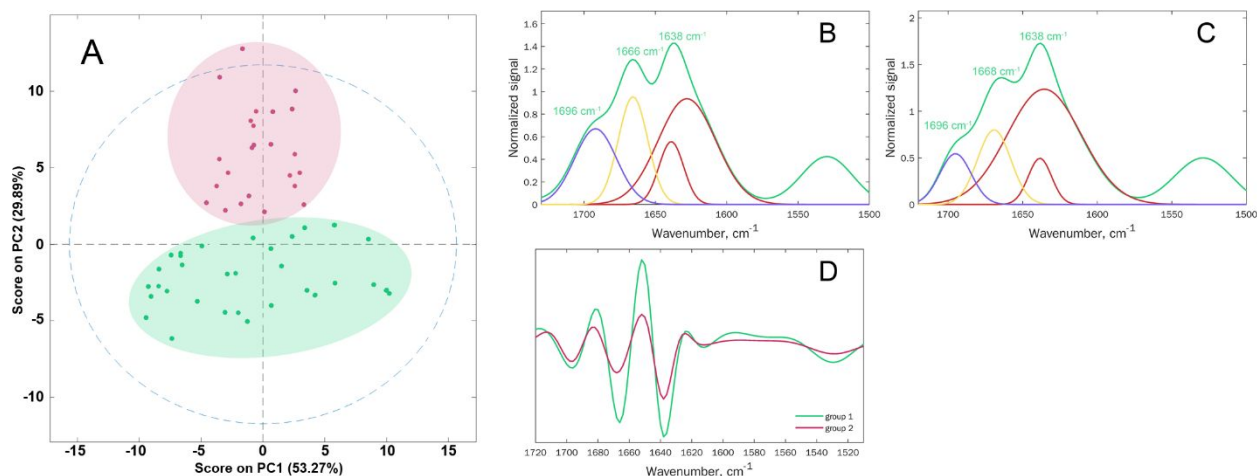

**Figure S8.** (A) PCA of spectra of  $A\beta_{1-42}$  protofibrils at 168-hour incubation time point, group 1 (green), group 2 (red). Fitted average IR-spectrum from group 1(B), group 2(C) of  $A\beta_{1-42}$  protofibrils at 168-hour incubation time point and corresponded structures: green line – fitted spectrum, red line – parallel beta-sheet, yellow line – unordered, violet line – anti-parallel beta-sheet. (D) Second derivative spectra of Amide I and Amide II region of 2 groups of aggregates.

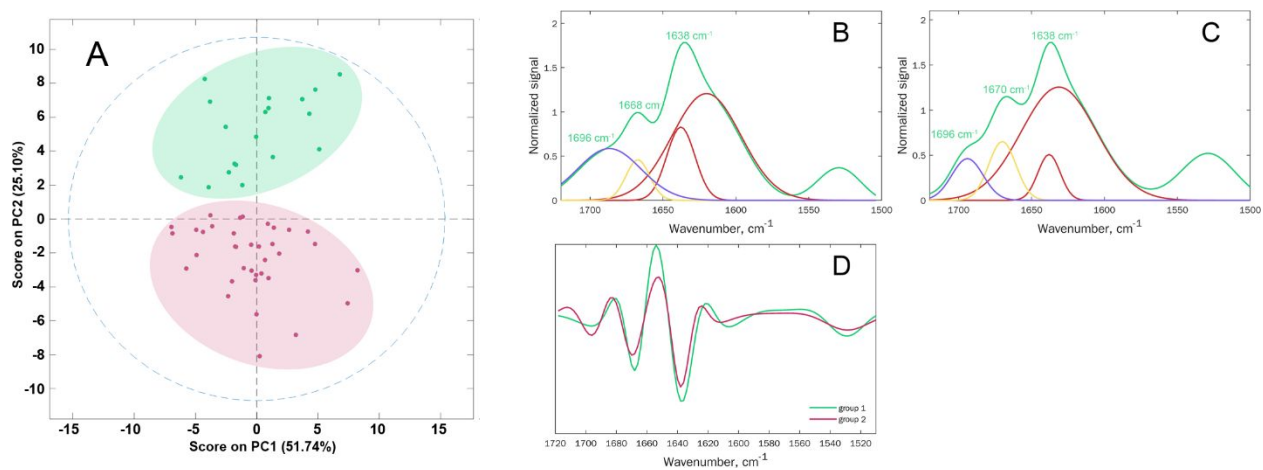

**Figure S9.** (A) PCA of spectra of  $A\beta_{1-42}$  fibrils at 168-hour incubation time point, group 1 (green), group 2 (red). Fitted average IR-spectrum from group 1(B), group 2(C) of  $A\beta_{1-42}$  fibrils at 168-hour incubation time point and corresponded structures: green line – fitted spectrum, red line – parallel beta-sheet, yellow line – unordered, violet line – anti-parallel beta-sheet. (D) Second derivative spectra of Amide I and Amide II region of 2 groups of aggregates.

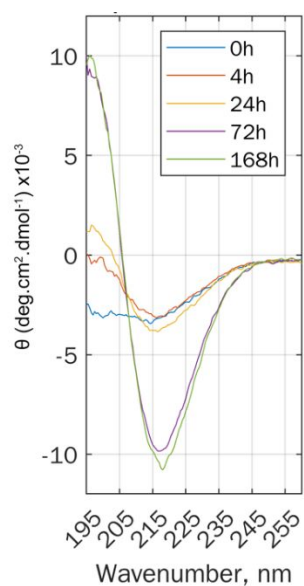

**Figure S10.** CD spectra of A $\beta_{1-42}$  collected at different time points of protein aggregation.

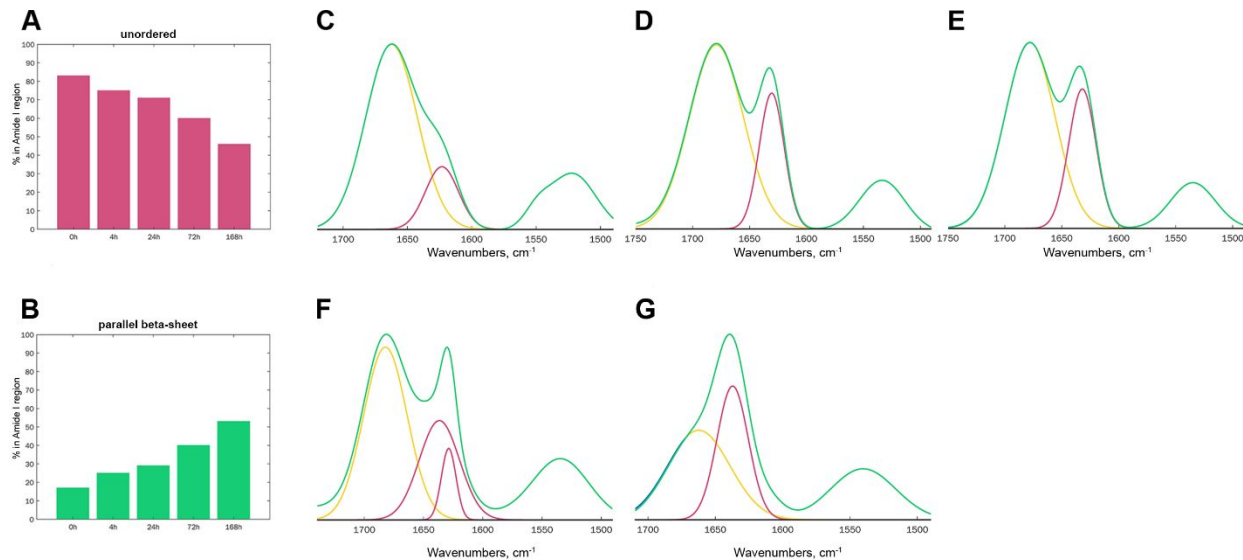

**Figure S11.** Content of unordered ( $1667\text{ cm}^{-1}$ ) (A), parallel beta-sheet ( $1625\text{-}1636\text{ cm}^{-1}$ ) (B) from FTIR-spectra. Fitted FTIR-spectrum of A $\beta_{1-42}$  aggregates in 0-hour time point (C), 4-hour time point (D), 24-hour time point (E), 72-hour time point (F), 168-hour time point (G), with corresponded structures: green line – fitted spectrum, red line – parallel beta-sheet, yellow line – unordered.

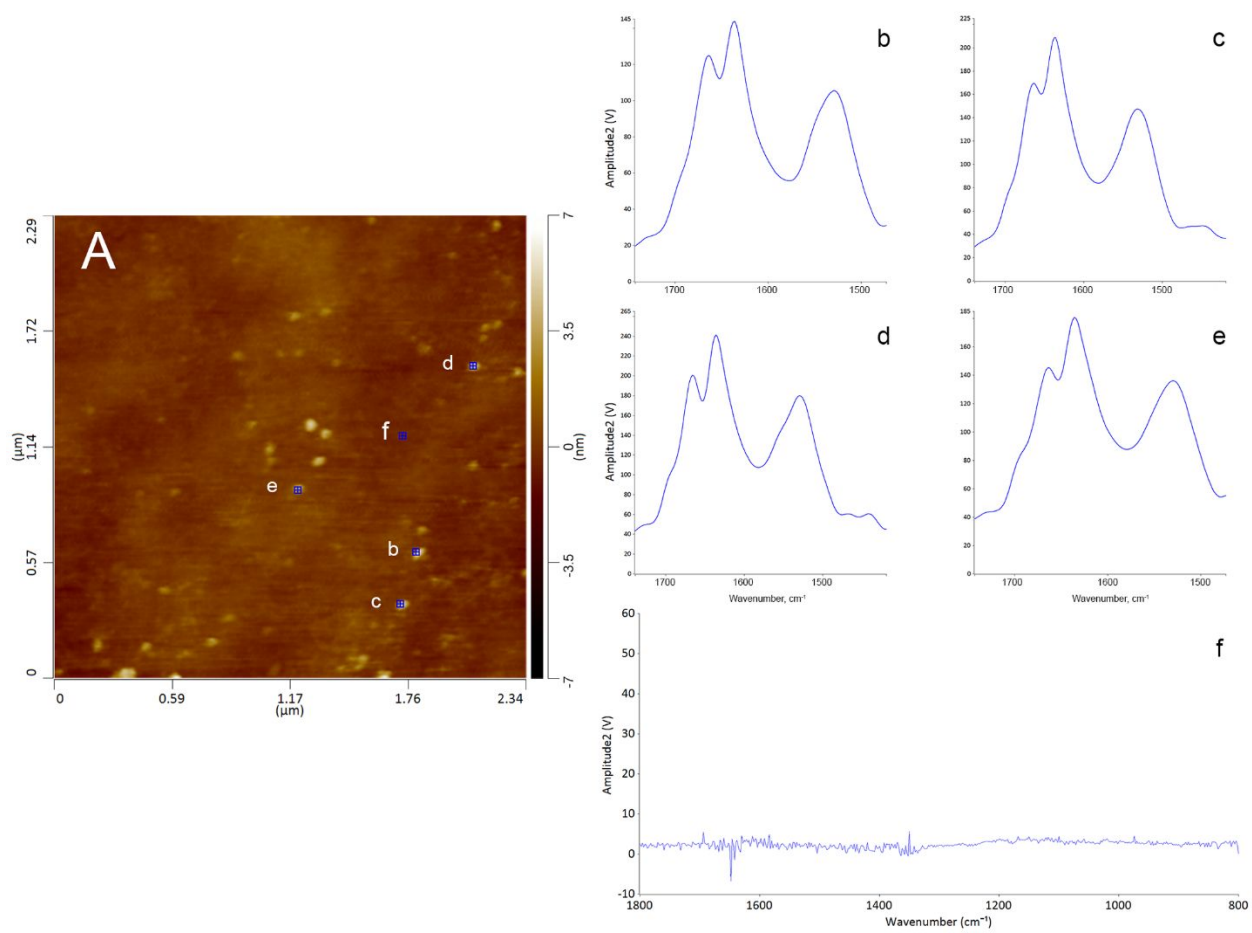

**Figure S12.** (A) AFM map of single oligomers of A $\beta$ <sub>1-42</sub> formed at 4h after initiation of protein aggregation. (b-e) Spectra from single oligomers (smoothing filter 10 points) and (f) background spectrum.



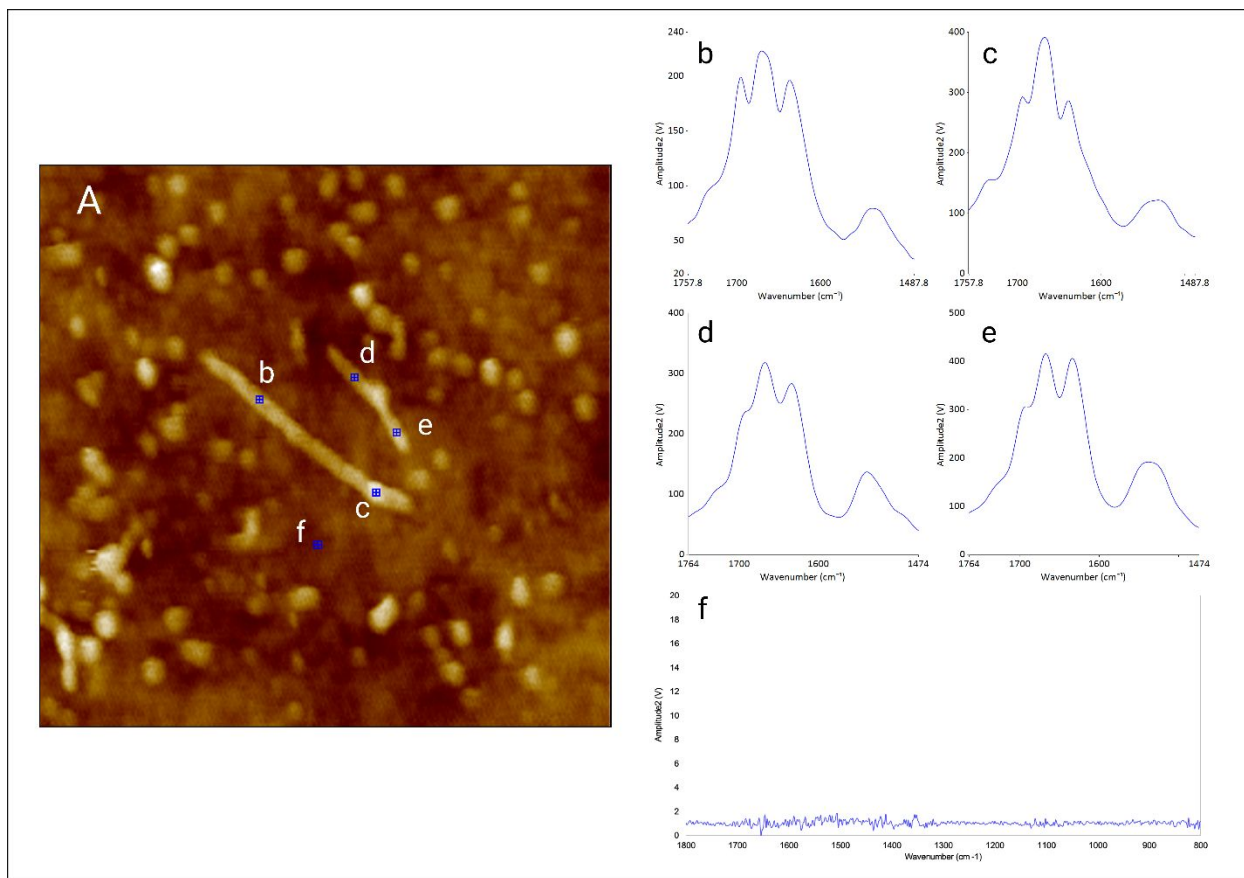

**Figure S13.** AFM map (left) of single proto-fibrils and fibrils of A $\beta_{1-42}$  formed at 168h after initiation of protein aggregation with the corresponding AFM-IR spectra (a-d).
